# Supplementary material
Source: publisher figshare collection journal article supplement (https://acs.figshare.com/ndownloader/files/6319389)
Supplement: Supplementary file 1 [file 6319389]

Compound_ID	SMILES
1	O=C(ON1C(CCC1=O)=O)OC2CCC/C=C/CC2
2	O=C(NCCCC(P(O)(O)=O)(P(O)(O)=O)O)OC1CCC/C=C/CC1
3	[L][Tc](OP(C1(CCCNC(OC2CCC/C=C/CC2)=O)O)(O)=O)(OP1(O)=O)(OP(C3(CCCNC(OC4CCC/C=C/CC4)=O)O)(O)=O)([L])OP3(O)=O
4	OC(CN1CCN(CC(O)=O)CCN(CC(NCCOCCOCCNC(CCCC(NC2=CN=C(C3=NN=C(C4=NC=CC=C4)N=N3)C=C2)=O)=O)=O)CCN(CC(O)=O)CC1)=O
5	O=C(O[Lu]123456OC7=O)C[N@]86CC[N@]1(C7)CC[N@]2(CC(NCCOCCOCCNC(CCCC(NC9=CN=C(C%10=NN=C(C%11=NC=CC=C%11)N=N%10)C=C9)=O)=O)=O5)CC[N@]3(CC(O4)=O)CC8
6	O=C(OC(C)(C)C)CN1C(CN(CC2=NC=CN2CC(OC(C)(C)C)=O)CCOCC(NCC3=CC=C(C4=NN=CN=N4)C=C3)=O)=NC=C1>>
7	O=C(O)CN1C(C[N]2(CCOCC(NCC3=CC=C(C4=NN=CN=N4)C=C3)=O)CC5=[N]6C=CN5CC(O)=O)=[N]([M]26([C]=O)([C]=O)[C]=O)C=C1
8	O=CC1=NC=CN1CC(OC(C)(C)C)=O
9	O=C(OC(C)(C)C)CN1C(CN(CC2=NC=CN2CC(OC(C)(C)C)=O)CCOCC(O)=O)=NC=C1
10	O=C(O)CN1C(C[N]2(CCOCC(NCC3=CC=C(C4=NN=CN=N4)C=C3)=O)CC5=[N]6C=CN5CC(O)=O)=[N]([M]26)C=C1.[C-]#[O+].[C-]#[O+].[C-]#[O+]
